# Supplementary material for: Single-Step FRET-Based Detection of Femtomoles DNA
Source: PubMed Central journal article supplement (PMC6719117; doi:10.3390/s19163495), 2019-08-09
Supplement: sensors-19-03495-s001.pdf [file sensors-19-03495-s001.pdf]

# Single-step FRET-based detection of femtomoles DNA

Kumar Sapkota, Anisa Kaur, Anoja Megalathan, Caleb Donkoh-Moore and Soma Dhakal \*

Department of Chemistry, Virginia Commonwealth University, Richmond, VA 23284, USA

\* Correspondence: sndhakal@vcu.edu

**Table S1.** Sequences for all the oligonucleotides used in assembling DNA constructs. All biotin- and fluorophore-modified DNA oligos were HPLC purified. S-I, S-II, S-III, and S-IV represent sensor-I through IV. The bulge region (internal loop) sequences are bolded. 'TEG' represents tetraethyleneglycol spacer between biotin and DNA, which helps avoid hindrance. The example schematics on the next page illustrate the naming of various strands used in making these sensors.

| Strand Name                                                                             | Sequence (5'-3')                                                                            |
|-----------------------------------------------------------------------------------------|---------------------------------------------------------------------------------------------|
| Cy3 strand                                                                              | Biotin-TEG/TGG AAC TCA CTA CTC GAT <b>TAG TGT ATG ACC</b> TCT ATA TGA GAG CTT<br>CTG AT/Cy3 |
| S-I Cy5 strand                                                                          | <b>Cy5/</b> TTC AGA AGC TCT CAT ATA GAA <b>TTA TAT TAT ATT</b> ACT AGT AGT GAG TTC CA       |
| S-II Cy5 strand                                                                         | <b>Cy5/</b> TCA TAT AGA <b>ATT ATA TTA TAT TAC</b> GAG TAG TGA GTT CCA                      |
| S-III Cy5 strand                                                                        | <b>Cy5/</b> TAT AGA <b>ATT ATA TTA TAT TAC</b> GAG TAG TGA GTT CCA                          |
| S-IV Cy5 strand                                                                         | <b>Cy5/</b> AT CAG ATT <b>TAT ATT ATA TTA</b> CGA GTA GTG AGT TCC A                         |
| S-II top strand                                                                         | ATC AGA AGC TC                                                                              |
| S-III top strand                                                                        | ATC AGA AGC TCT C                                                                           |
| S-I Probe                                                                               | ATC TGA ACC TCT CAT ATA GAG GTC ATA CAC ATA GCA CTT TTT ACA                                 |
| S-I Target                                                                              | TGT AAA AAG TGC TAT GTG TAT GAC CTC TAT ATG AGA G                                           |
| S-II & S-III Probe                                                                      | TCA TAT AGA GGT CAA TAG CAC TTT TTA CA                                                      |
| S-II & S-III Target                                                                     | TGT AAA AAG TGC TAT TGA CCT CTA TAT GA                                                      |
| S-IV Probe                                                                              | ACA TTT TTC ACG ATA AAT ATA AAT CTG AG                                                      |
| S-IV Target                                                                             | ATC AGA TTT ATA TTT ATC GTG AAA AAT GT                                                      |
| <b>Sequences used for SNP experiments: (C to G mismatch is shown in red and bolded)</b> |                                                                                             |
| Probe                                                                                   | TAT AGA GGT CAG <b>TAG CT</b>                                                               |
| Target                                                                                  | AGC <b>TAC</b> TGA CCT CTA TA                                                               |
| Mutant                                                                                  | AGC <b>TAG</b> TGA CCT CTA TA                                                               |
| Random                                                                                  | CAT AGT TGA CCT CTA TA                                                                      |

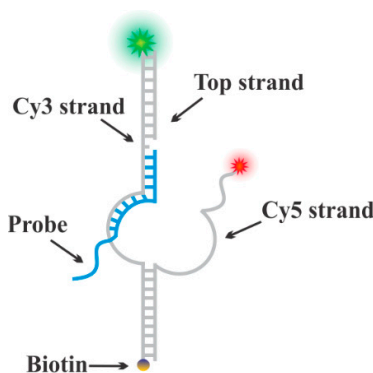

**Sensor-III**

Figure S1. Example schematics of sensors with strand name matching the Table S1.

**Table 2.** Thermal annealing program for the assembly of DNA constructs. The thermal annealing was carried out by ramping the temperature of the solution from 95 °C to 4 °C in a thermal cycler as described. <sup>1,2</sup>

| <b>Temperature (°C)</b> | <b>Time (min)</b> |
|-------------------------|-------------------|
| 95                      | 5                 |
| 93                      | 5                 |
| 90                      | 5                 |
| 88                      | 5                 |
| 86                      | 5                 |
| 84                      | 5                 |
| 82                      | 5                 |
| 80                      | 5                 |
| 78                      | 5                 |
| 76                      | 5                 |
| 72                      | 5                 |
| 68                      | 5                 |
| 64                      | 5                 |
| 60                      | 5                 |
| 56                      | 5                 |
| 52                      | 5                 |
| 48                      | 5                 |
| 44                      | 5                 |
| 40                      | 5                 |
| 36                      | 5                 |
| 32                      | 5                 |
| 28                      | 5                 |
| 24                      | 5                 |
| 4                       | hold              |

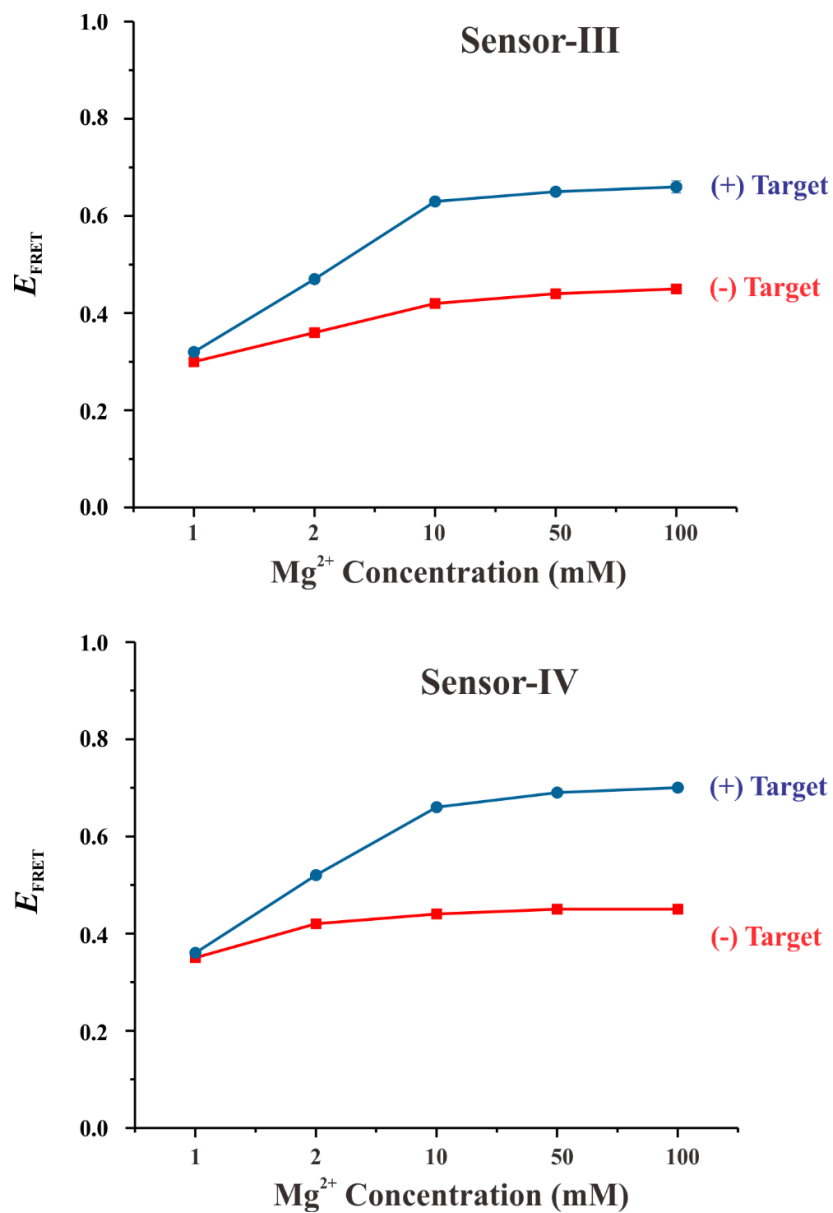

**Figure S2.** Mg<sup>2+</sup>-dependent switching of sensors determined by bulk FRET analysis for sensor-III (top) and sensor-IV (bottom). In the presence of target, the FRET efficiency was gradually increased until 10 mM Mg<sup>2+</sup> and was plateaued at higher concentration for both of the sensors. The slight increase in the FRET efficiency even in the absence of target suggested a compaction of single-stranded oligos due to electrostatic shielding of negative charge on DNA.<sup>2</sup>

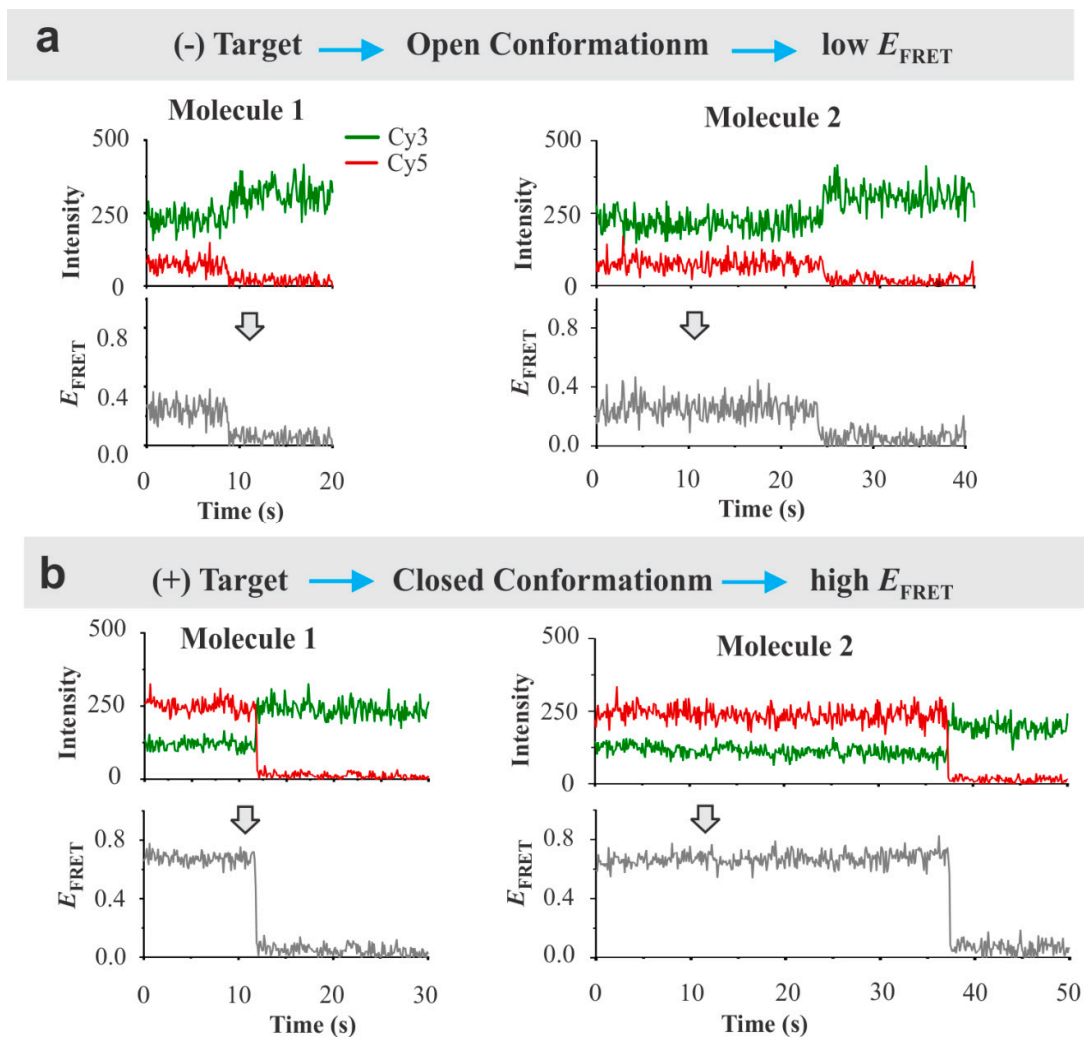

**Figure S3.** Typical single-molecule traces with photobleaching of fluorophores soon after illumination of green laser (<15 s, left panel) or after 20 s (right panel). Top panels display intensity-time traces of the Cy3 (green) and Cy5 (red) fluorophores and the bottom panels show corresponding FRET efficiencies. The single molecules were confirmed by anti-correlation between the Cy3 and Cy5 intensities. (a) Open conformation (low- $E_{\text{FRET}}$  state). (b) Closed conformation (high- $E_{\text{FRET}}$  state). All traces were taken from sensor-III.

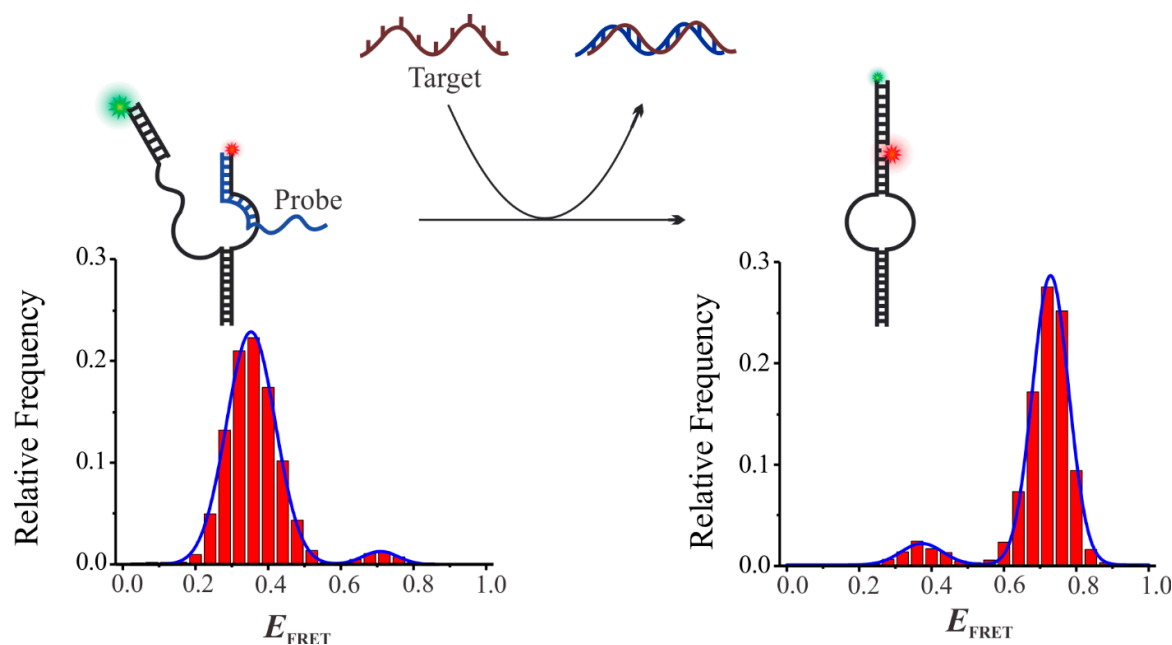

**Figure S4.** smFRET analysis of sensor-III with probe binding to Cy5-labeled strand. Unlike original design, the probe was designed to partially hybridized to the Cy5-labeled strand instead of Cy3-labeled strand. This experiment was performed to demonstrate the flexibility in the sensor design. As expected, in the presence of target, probe was displaced from the sensor; consequently, conformational switching of sensor-III resulted in high- $E_{\text{FRET}}$  state. The experiment was performed at 1  $\mu\text{M}$  target.

#### References

1. Kaur, A.; Sapkota, K.; Dhakal, S. Multiplexed Nucleic Acid Sensing with Single-Molecule FRET. *ACS Sens.* **2019**, *4*(3), 623–633.
2. Gibbs, D. R.; Dhakal, S. Single-Molecule Imaging Reveals Conformational Manipulation of Holliday Junction DNA by the Junction Processing Protein RuvA. *Biochemistry* **2018**, *57* (26), 3616–3624.
3. Newby Lambert, M.; Vöcker, E.; Blumberg, S.; Redemann, S.; Gajraj, A.; Meiners, J.-C.; Walter, N. G. Mg<sup>2+</sup>-Induced Compaction of Single RNA Molecules Monitored by Tethered Particle Microscopy. *Biophys J.* **2006**, *90* (10), 3672–3685.
